# Supplementary material for: Surprisingly strong effect of stabilizer on the properties of Au nanoparticles and Pt^Au nanostructures in electrocatalysis
Source: Royal Society of Chemistry journal article supplement (doi:10.1039/c0nr00295j), 2010-01-01

## Electronic Supplementary Information

# Surprisingly strong effect of stabilizer on the properties of Au nanoparticles and Pt<sup>Au</sup> nanostructures in electrocatalysis

*Gui-Rong Zhang and Bo-Qing Xu\**

Innovative Catalysis Program, Key Lab of Organic Optoelectronics & Molecular  
Engineering, Department of Chemistry, Tsinghua University, Beijing, 100084, China.

\* Corresponding author: Professor Bo-Qing Xu

Telephone & Fax: +86-10-62792122

E-mail: [bxu@mail.tsinghua.edu.cn](mailto:bqxu@mail.tsinghua.edu.cn)

**Table S1:** Preparation conditions of Au-*d*-PVP colloids

| Sample              | $d_{\text{seeds}}/\text{nm}^b$ | $V_{\text{seeds}}/\text{mL}^c$ | $V_{\text{HAuCl}_4}/\text{mL}^d$ | $V_{\text{AA}}/\text{mL}^e$ | Molar ratio of<br>HAuCl <sub>4</sub> /reductant | $d/\text{nm}^f$ |
|---------------------|--------------------------------|--------------------------------|----------------------------------|-----------------------------|-------------------------------------------------|-----------------|
| Au-1.9 <sup>a</sup> | -                              | -                              | 1.00                             | -                           | 1:10                                            | 1.9±0.4         |
| Au-3-PVP            | 1.9                            | 10.0                           | 0.25                             | 3.8                         | 1:1.5                                           | 3.2±0.5         |
| Au-5-PVP            | 1.9                            | 10.0                           | 1.00                             | 15.0                        | 1:1.5                                           | 4.7±0.7         |
| Au-10-PVP           | 4.7                            | 5.8                            | 1.00                             | 15.0                        | 1:1.5                                           | 10.3±1.8        |

<sup>a</sup> Au-1.9 is obtained by using sodium borohydrate as the reductant; <sup>b</sup>  $d_{\text{seeds}}$  is mean particle size of Au seeds; <sup>c</sup> the concentration of seeds by moles of Au is 1.0 mmol•L<sup>-1</sup>; <sup>d</sup> the concentration of HAuCl<sub>4</sub> is 50 mmol•L<sup>-1</sup>; <sup>e</sup> the concentration of ascorbic acid (AA) is 5.0 mmol•L<sup>-1</sup>; <sup>f</sup>  $d$  is the average size of Au nanoparticles.

**Fig. S1.** Representative TEM images of (a) Au-5-PVP, (b) Au-5-PVA, (c) Pt<sub>0.10</sub>^Au-3-PVP, (d) Pt<sub>0.10</sub>^Au-5-PVP, (e) Pt<sub>0.10</sub>^Au-10-PVP, (f) Pt<sub>0.10</sub>^Au-3-PVP /C.

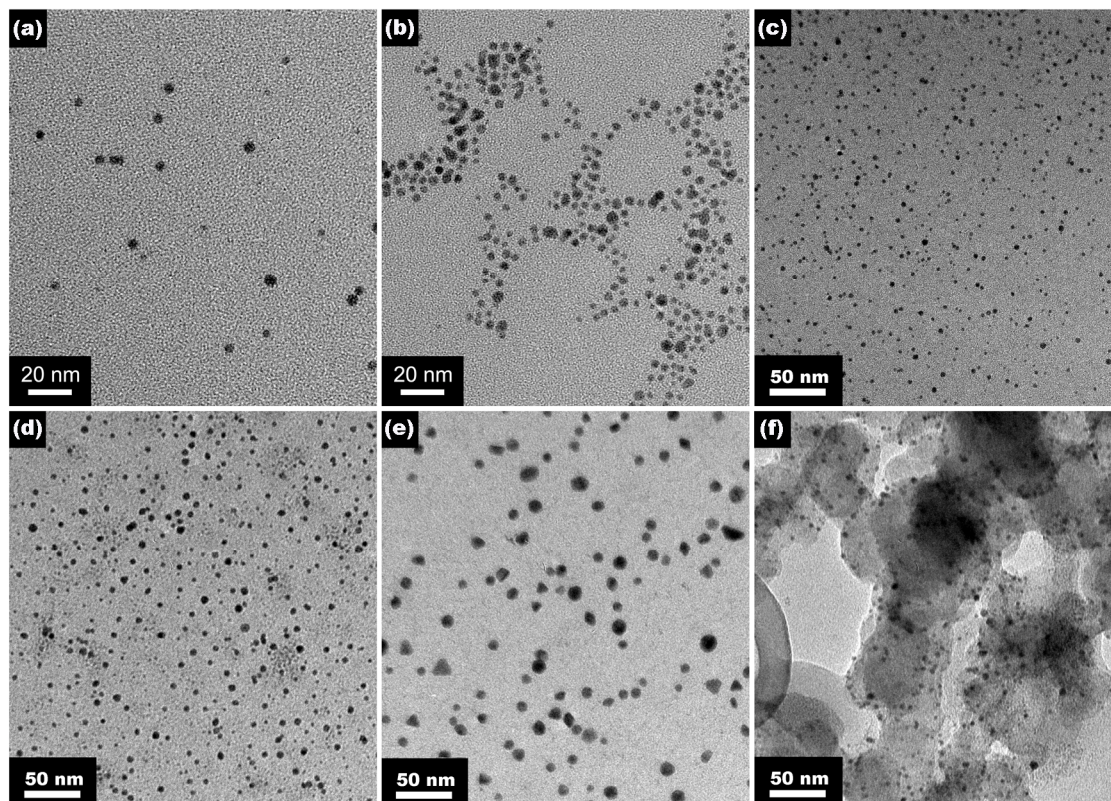

**Fig. S2.** Cyclic voltammogram of formic acid electrooxidation on (a) Pt<sup>^</sup>Au-3-PVP/C, (b) Pt<sup>^</sup>Au-3-PVA/C, (c) Pt<sup>^</sup>Au-5-PVP/C, (d) Pt<sup>^</sup>Au-5-PVA/C, (e) Pt<sup>^</sup>Au-10-PVP/C, (f) Pt<sup>^</sup>Au-10-Citr/C. The black solid lines are for anodic and red dotted lines for cathodic scans.

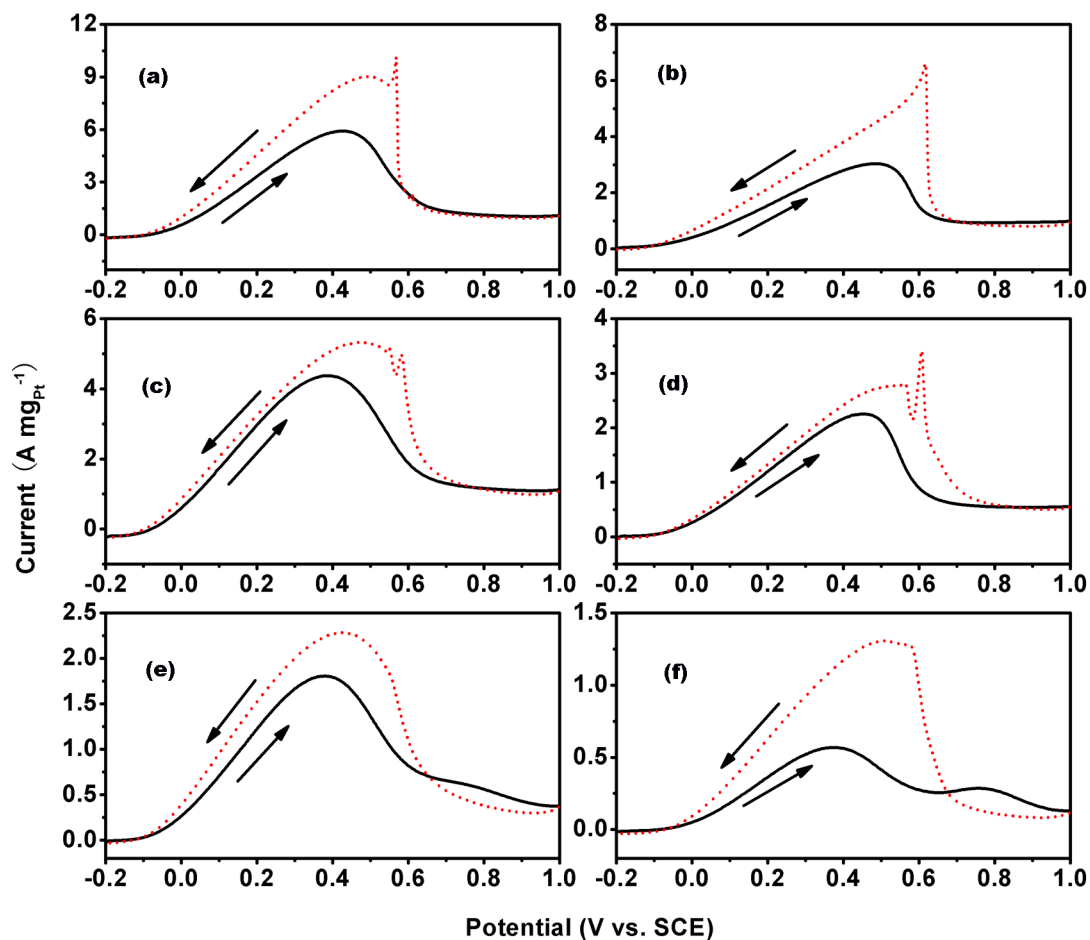

Supplement: c0nr00295j.pdf [file c0nr00295j.pdf]
